# Supplementary material
Source: PubMed Central journal article supplement (PMC4418881)
Supplement: pnas.201500541SI.pdf [file pnas.201500541SI.pdf]

# Supporting Information

Tung et al. 10.1073/pnas.1500541112

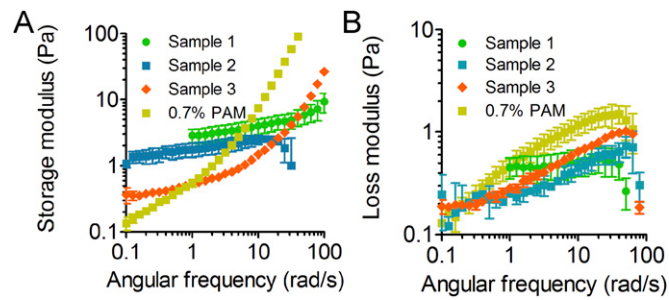

**Fig. S1.** Rheology measurements of bovine cervical mucus samples and our high-viscoelasticity medium (0.7% PAM) sample. (A) Storage modulus describes the elasticity of the samples. (B) Loss modulus describes the viscosity of the samples. Given the variability of the biological samples, our high-viscoelasticity medium resembles the bovine cervical mucus reasonably well.

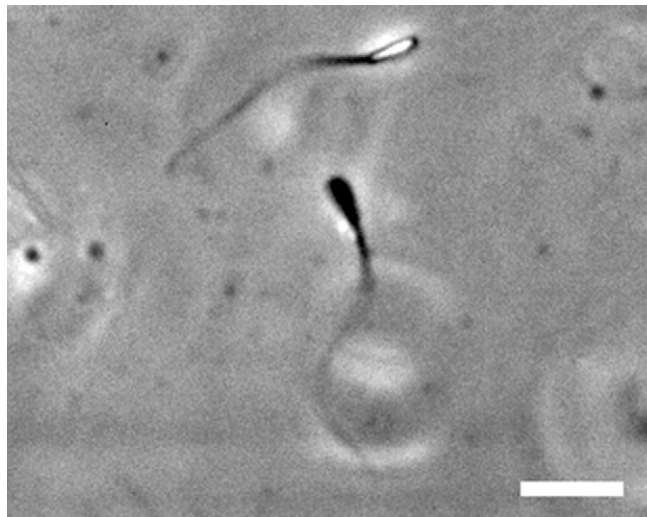

**Movie S1.** Sperm motility in TALP. Sperm swam via the self-rolling of its body in TALP. Recorded at 200 FPS, replayed at 10 FPS. (Scale bar: 20  $\mu\text{m}$ .)

[Movie S1](#)

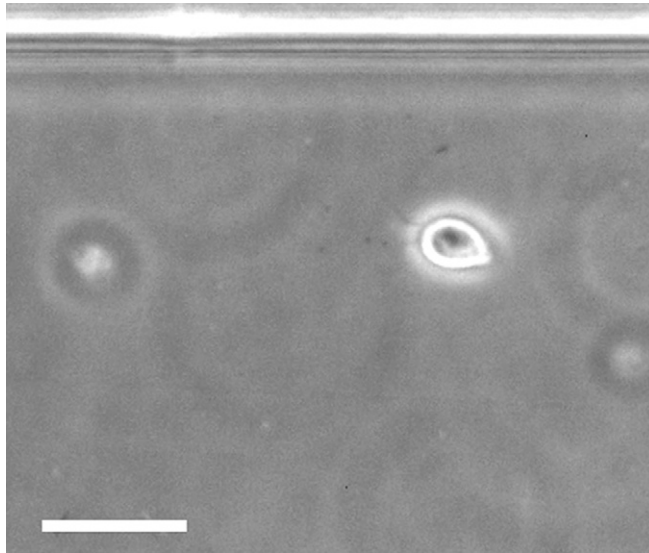

**Movie S2.** *T. foetus* motility in TALP. *T. foetus* swam via coordinated wave motion of the three anterior flagella. Recorded at 20 FPS, replayed at 10 FPS. (Scale bar: 20  $\mu\text{m}$ .)

[Movie S2](#)

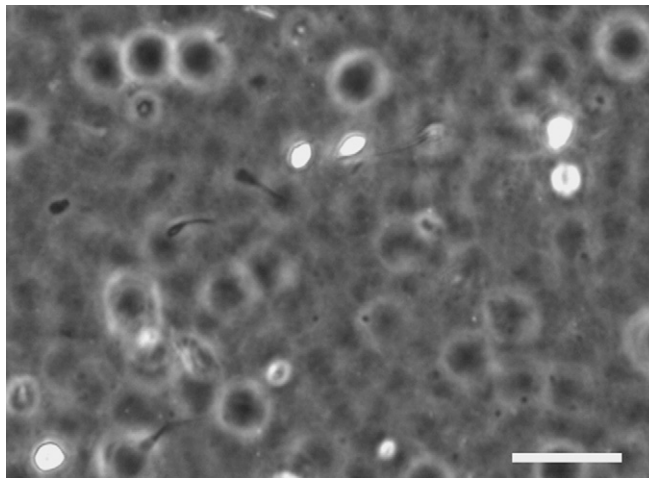

**Movie S3.** Differential swimming behaviors of sperm and *T. foetus* in the presence of fluid flow. With 1  $\mu\text{L}/\text{min}$  of flow, sperm were able to migrate against the flow, whereas *T. foetus* were brought downstream. Recorded at 18 FPS, replayed at 9 FPS. (Scale bar: 50  $\mu\text{m}$ .)

[Movie S3](#)

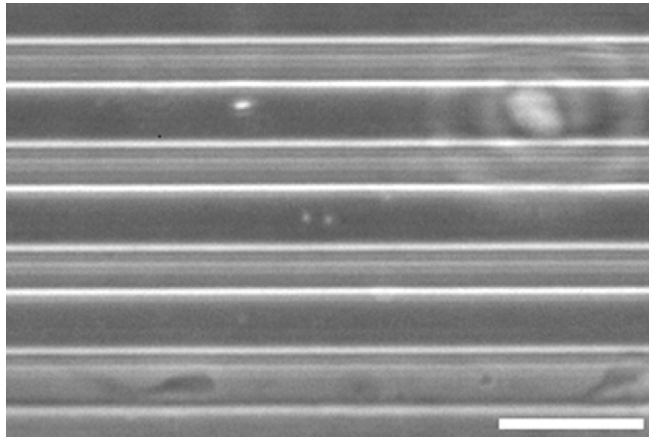

**Movie S4.** Sperm used microgrooves to swim upstream, whereas *T. foetus* did not. With 1  $\mu\text{L}/\text{min}$  of flow, sperm used the microgrooves and migrated upstream (flow from the right), whereas *T. foetus* were brought downstream. Recorded at 18 FPS, replayed at 5 FPS. (Scale bar: 50  $\mu\text{m}$ .)

[Movie S4](#)

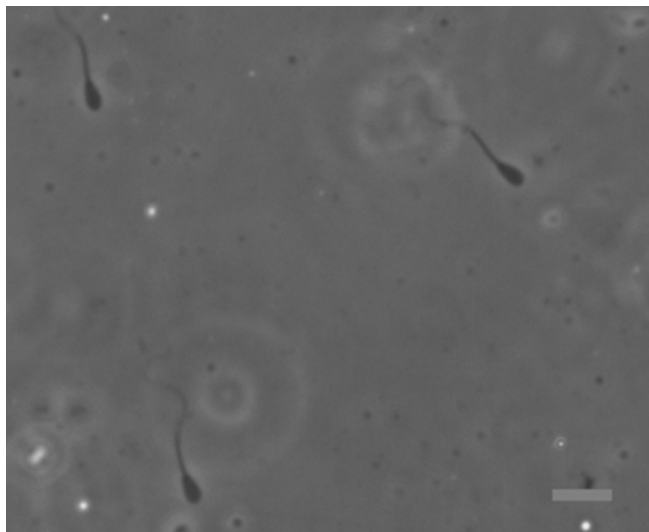

**Movie S5.** Sperm motility in high-viscoelasticity medium. Sperm swam via the planar beating of the flagellum in viscoelastic medium. Recorded at 71 FPS and replayed at 10 FPS. (Scale bar: 20  $\mu\text{m}$ .)

[Movie S5](#)

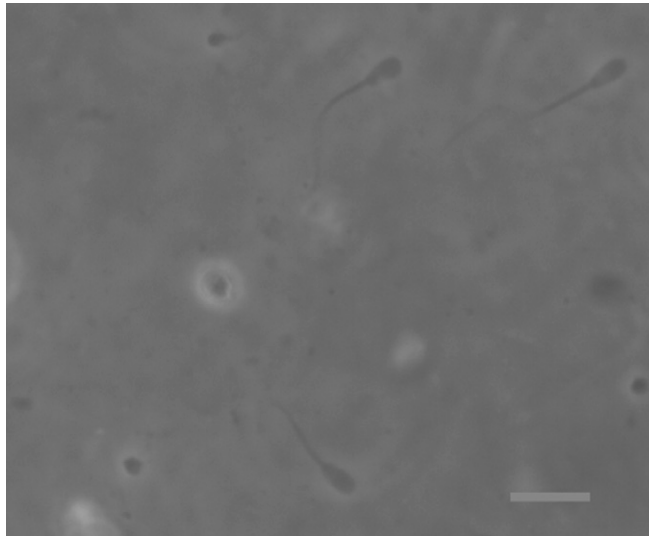

**Movie S6.** Sperm motility in bovine cervical mucus. Sperm motility in bovine cervical mucus was similar to that in high viscoelasticity medium. Recorded at 100 FPS, replayed at 10 FPS. (Scale bar: 20  $\mu\text{m}$ .)

[Movie S6](#)

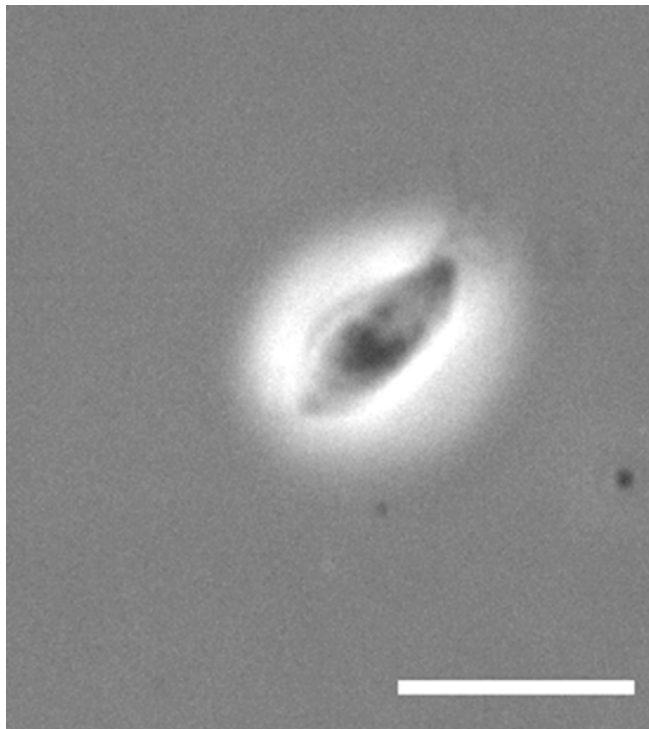

**Movie S7.** *T. foetus* motility in high-viscoelasticity medium PAM. Recorded at 20 FPS, replayed at 10 FPS. (Scale bar: 20  $\mu\text{m}$ .)

[Movie S7](#)
